# Supplementary material for: Crosstalk between Irisin Levels, Liver Fibrogenesis and Liver Damage in Non-Obese, Non-Diabetic Individuals with Non-Alcoholic Fatty Liver Disease
Source: MDPI journal article supplement (doi:10.3390/jcm11030635), 2022-01-27
Supplement: s1 [file s1]

**Supplementary Figure S1.** Flow chart of the study.

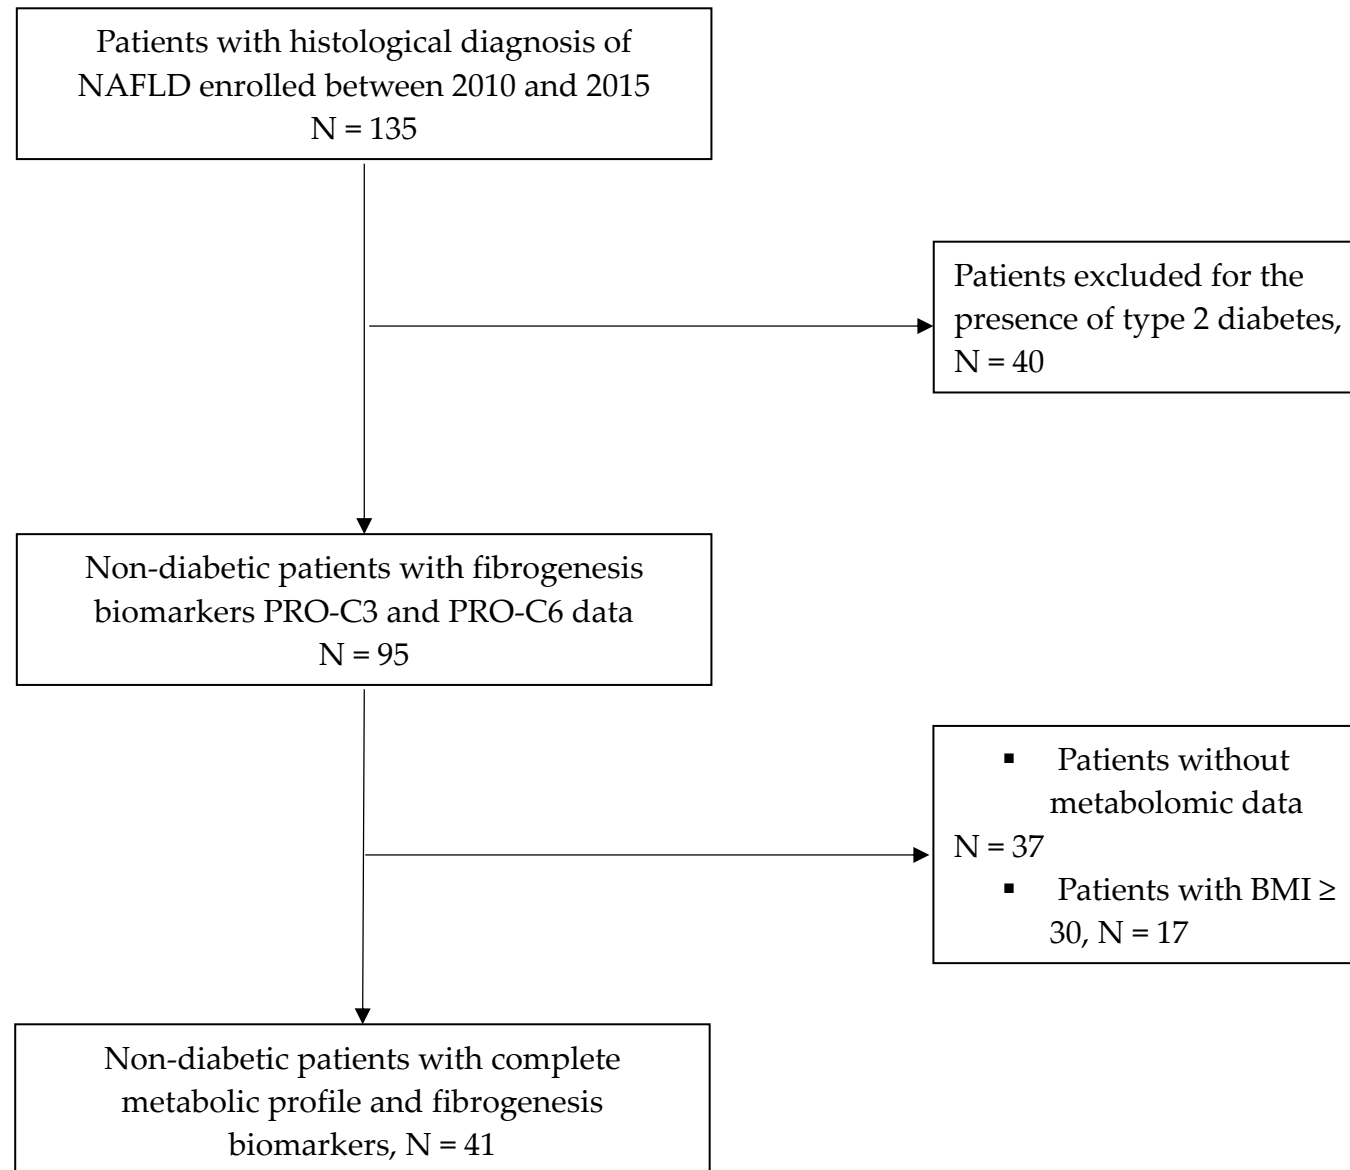

**Supplementary Table S1.** Correlations between irisin, PRO-C3 and PRO-C6 with the histological features of NASH.

|                                 |         | <b>Irisin<br/>(ng/ml)</b> | <b>PRO-C3<br/>(ng/ml)</b> | <b>PRO-C6<br/>(ng/ml)</b> | <b>Ballooning</b> | <b>Lobular<br/>inflammation</b> | <b>Steatosis</b> | <b>NAS</b> |
|---------------------------------|---------|---------------------------|---------------------------|---------------------------|-------------------|---------------------------------|------------------|------------|
| <b>Irisin (ng/ml)</b>           | rs      |                           | 0.466                     | 0.462                     | -0.205            | -0.003                          | -0.169           | -0.142     |
|                                 | P value |                           | 0.0037                    | 0.004                     | 0.2056            | 0.9844                          | 0.296            | 0.3832     |
| <b>PRO-C3 (ng/ml)</b>           | rs      | 0.466                     |                           | 0.875                     | 0.263             | 0.149                           | 0.311            | 0.291      |
|                                 | P value | 0.0037                    |                           | <0.0001                   | 0.1101            | 0.3727                          | 0.0574           | 0.0765     |
| <b>PRO-C6 (ng/ml)</b>           | rs      | 0.462                     | 0.875                     |                           | 0.113             | 0.132                           | 0.305            | 0.211      |
|                                 | P value | 0.004                     | <0.0001                   |                           | 0.4985            | 0.4289                          | 0.0627           | 0.2033     |
| <b>Ballooning</b>               | rs      | -0.205                    | 0.263                     | 0.113                     |                   | 0.265                           | 0.257            | 0.642      |
|                                 | P value | 0.2056                    | 0.1101                    | 0.4985                    |                   | 0.0944                          | 0.1042           | <0.0001    |
| <b>Lobular<br/>inflammation</b> | rs      | -0.003                    | 0.149                     | 0.132                     | 0.265             |                                 | 0.226            | 0.762      |
|                                 | P value | 0.9844                    | 0.3727                    | 0.4289                    | 0.0944            |                                 | 0.1562           | <0.0001    |
| <b>Steatosis</b>                | rs      | -0.169                    | 0.311                     | 0.305                     | 0.257             | 0.226                           |                  | 0.644      |
|                                 | P value | 0.296                     | 0.0574                    | 0.0627                    | 0.1042            | 0.1562                          |                  | <0.0001    |
| <b>NAS</b>                      | rs      | -0.142                    | 0.291                     | 0.211                     | 0.642             | 0.762                           | 0.644            |            |
|                                 | P value | 0.3832                    | 0.0765                    | 0.2033                    | <0.0001           | <0.0001                         | <0.0001          |            |

Abbreviations: NAS: Non-Alcoholic Fatty Liver Disease (NAFLD) Activity Score; PRO-C3, N-terminal type III collagen propeptide; PRO-C6, propeptide of type VI collagen.
